# Supplementary material for: Inverse electrochemical probing of thermodynamic activity in hypersaline brines using reverse electrodialysis
Source: Research Square preprint supplement (doi:10.21203/rs.3.rs-8574892/v2), 2026-01-26
Supplement: Supplementary file 1 [file fafe6c6963bd6893d5173ecd.pdf]

# Supplementary Information

## A New Paradigm for Brine Thermodynamics: Inverse Electrochemical Probing of Activity Using Reverse Electrodialysis

Babaa Moulay Rachid

## Supplementary Information

### Supplementary Note S1. Seasonal thermodynamic and transport property calculations

This work is entirely model-based. Seasonal solution properties were generated by coupling multi-ion Pitzer thermodynamics with a permselectivity-corrected reverse electrodialysis (RED) electrochemical model. For each season, the thermodynamic state of both the hypersaline (concentrated) stream and treated wastewater (TWW; dilute) stream was characterized in terms of mean ionic activity and associated transport properties (electrical conductivity). The resulting seasonal activity–conductivity pairs are tabulated in Tables S3 and S4.

#### S1.1 Seasonal forcing and inputs

For each season  $s \in \{\text{Summer, Autumn, Winter, Spring}\}$ , the following inputs were prescribed: (i) temperature  $T_s$  (K), converted from Celsius via

$$T_s = T_{C,s} + 273.15; \quad (1)$$

(ii) ionic compositions expressed as molalities  $m_{i,s}$  ( $\text{mol kg}^{-1}$ ) for the hypersaline and TWW streams; (iii) multi-ion Pitzer interaction parameters from the literature; and (iv) RED system parameters including stack size  $N$ , average permselectivity  $\alpha$ , and constants  $R$  and  $F$ .

#### S1.2 Ionic strength calculation

For each stream and season, the ionic strength was computed as

$$I_s = \frac{1}{2} \sum_i m_{i,s} z_i^2, \quad (2)$$

where  $m_{i,s}$  and  $z_i$  are the molality and charge of ion  $i$ , respectively.

### S1.3 Mean ionic activity coefficients

Mean ionic activity coefficients  $\gamma_{\pm,s}$  were computed using the multi-ion Pitzer formalism, in which

$$\ln \gamma_{\pm,s} = f(I_s, T_s) + \sum (\text{interaction terms}), \quad (3)$$

combining long-range electrostatic and short-range ion-ion interactions.

### S1.4 Mean ionic activity calculation

Mean ionic activities were computed on the molality scale as

$$a_{\pm,s} = \gamma_{\pm,s} \left( \frac{m_s}{m^\circ} \right), \quad m^\circ = 1 \text{ mol kg}^{-1}. \quad (4)$$

For the hypersaline stream this yields an effective activity  $a_{\text{H}}^{(\text{eff})}$ , while the dilute stream activity is denoted  $a_{\text{TWW}}$ .

### S1.5 Electrical conductivity computation

Electrical conductivity  $\kappa_s$  was computed consistently with the same thermodynamic state defined by  $(T_s, m_{i,s})$ . Conductivity was used to parameterize the channel resistance via

$$R_{\text{ch},s} = \frac{l}{\kappa_s A}, \quad (5)$$

where  $l$  is channel length and  $A$  the channel cross-sectional area.

### S1.6 Link to inverse thermodynamic probe framework

The seasonal activities reported in Tables S3 and S4 enter the permselectivity-corrected RED voltage expression

$$E_{\text{OCV},s} = \alpha N \frac{RT_s}{zF} \ln \left( \frac{a_{\pm,c,s}}{a_{\pm,d,s}} \right). \quad (6)$$

Deviations between ideal and non-ideal voltage predictions encode non-ideal thermodynamic information and enable inference of activity-coefficient effects from electrical observables.

## S2. Multi-ion thermodynamic model for Aral Sea brine

The ionic composition of the Aral Sea brine used in this work is summarised in Table S1. Concentrations are expressed as molality  $m_i$  (mol kg<sup>-1</sup> of water).

The ionic strength of the brine is

$$I = \frac{1}{2} \sum_i m_i z_i^2 = 5.13 \text{ mol kg}^{-1}. \quad (7)$$

At this ionic strength, ion non-ideality is described using the multi-ion Pitzer formulation. For ion  $i$ , the activity coefficient is

$$\ln \gamma_i = z_i^2 f(I) + \sum_j m_j B_{ij}(I) + \sum_{j,k} m_j m_k C_{ijk}, \quad (8)$$

Table 1: Ionic composition and transport parameters for Aral Sea brine at 25 °C.

| Ion                           | $c$ (g L <sup>-1</sup> ) | $M$ (g mol <sup>-1</sup> ) | $C$ (mol L <sup>-1</sup> ) | $z$ | $m$ (mol kg <sup>-1</sup> ) | $0.5 m z^2$ | $\lambda_i^0$ (S m <sup>2</sup> mol <sup>-1</sup> ) |
|-------------------------------|--------------------------|----------------------------|----------------------------|-----|-----------------------------|-------------|-----------------------------------------------------|
| Cl <sup>-</sup>               | 84.62                    | 35.45                      | 2.387                      | -1  | 2.3978                      | 1.1989      | 0.007635                                            |
| SO <sub>4</sub> <sup>2-</sup> | 69.95                    | 96.06                      | 0.728                      | -2  | 0.7315                      | 1.4630      | 0.016000                                            |
| HCO <sub>3</sub> <sup>-</sup> | 0.88                     | 61.02                      | 0.0144                     | -1  | 0.0145                      | 0.0072      | 0.004450                                            |
| Na <sup>+</sup>               | 62.43                    | 22.99                      | 2.716                      | +1  | 2.7278                      | 1.3639      | 0.005010                                            |
| K <sup>+</sup>                | 3.82                     | 39.10                      | 0.0977                     | +1  | 0.0981                      | 0.0491      | 0.007350                                            |
| Ca <sup>2+</sup>              | 0.35                     | 40.08                      | 0.0087                     | +2  | 0.0088                      | 0.0175      | 0.011900                                            |
| Mg <sup>2+</sup>              | 12.44                    | 24.31                      | 0.512                      | +2  | 0.5140                      | 1.0281      | 0.010600                                            |

where  $f(I)$  is the Debye–Hückel long-range term,  $B_{ij}$  are binary interaction terms, and  $C_{ijk}$  are ternary interaction terms.

For RED calculations, we define an effective charge-equivalent activity of the high-salinity stream as

$$a_{\text{H}}^{(\text{eff})} \equiv \sum_i |z_i| a_i = \sum_i |z_i| m_i \gamma_i. \quad (9)$$

Evaluated at 25 °C, this yields

$$a_{\text{H}}^{(\text{eff})}(25^\circ\text{C}) \approx 1.1 \text{ mol kg}^{-1}. \quad (10)$$

### S3. Conductivity of Aral brine and treated wastewater

The equivalent fraction of ion  $i$  is

$$y_i = \frac{|z_i| m_i}{\sum_j |z_j| m_j}, \quad \sum_j |z_j| m_j = 7.75 \text{ mol kg}^{-1}. \quad (11)$$

The mixture limiting equivalent conductance is

$$\bar{\lambda}^0 = \sum_i y_i \lambda_i^0 \approx 8.68 \times 10^{-3} \text{ S m}^2 \text{ mol}^{-1}. \quad (12)$$

For the purpose of estimating electrical conductivity, a charge-equivalent volumetric concentration is introduced as

$$c_{\text{eq}}^0 = \left( \sum_i |z_i| m_i \right) \times 10^3 = 7.75 \times 10^3 \text{ mol m}^{-3}, \quad (13)$$

yielding a limiting conductivity

$$\kappa^0 = \bar{\lambda}^0 c_{\text{eq}}^0 \approx 67 \text{ S m}^{-1}. \quad (14)$$

To account for ion pairing and mobility reduction at high ionic strength, an empirical reduction factor is calibrated against measured conductivity:

$$f_\kappa = \frac{\kappa_{\text{meas}}}{\kappa^0} = \frac{22.4}{67} \approx 0.33, \quad (15)$$

leading to the effective conductivity used in the RED model,

$$\kappa_{\text{sea}}(25^\circ\text{C}) = f_\kappa \kappa^0 \approx 22.4 \text{ S m}^{-1}. \quad (16)$$

For treated wastewater (TWW), a NaCl-equivalent concentration of  $C_{\text{TWW}} = 26 \text{ mol m}^{-3}$  is assumed. The Davies equation gives  $\gamma_\pm \approx 0.86$ , yielding

$$a_{\text{TWW}}(25^\circ\text{C}) = m\gamma_\pm \approx 0.0223 \text{ mol kg}^{-1}. \quad (17)$$

Based on field data, the baseline conductivity is taken as

$$\kappa_{\text{TWW}}(25^\circ\text{C}) = 0.263 \text{ S m}^{-1}. \quad (18)$$

## S4. Seasonal temperature dependence

Seasonal-average temperatures were used to recompute activities and conductivities following the same workflow. Activities were updated as

$$a(T) = a(T_{\text{ref}}) \frac{T}{T_{\text{ref}}}, \quad T_{\text{ref}} = 298.15 \text{ K}, \quad (19)$$

and conductivities using a linear temperature coefficient

$$\kappa(T) = \kappa(T_{\text{ref}}) [1 + \alpha_\kappa (T_C - 25)], \quad \alpha_\kappa = 0.02 \text{ }^\circ\text{C}^{-1}. \quad (20)$$

Table 2: Seasonal-average activities and conductivities used in the RED model.

| Season | $T_C$ ( $^\circ\text{C}$ ) | $T$ (K) | $a_{\text{H}}^{(\text{eff})}$ | $a_{\text{TWW}}$ | $\kappa_{\text{sea}}$ ( $\text{S m}^{-1}$ ) | $\kappa_{\text{TWW}}$ ( $\text{S m}^{-1}$ ) |
|--------|----------------------------|---------|-------------------------------|------------------|---------------------------------------------|---------------------------------------------|
| Summer | 26.41                      | 299.56  | 1.105                         | 0.0224           | 23.03                                       | 0.270                                       |
| Autumn | 12.58                      | 285.73  | 1.054                         | 0.0214           | 16.84                                       | 0.198                                       |
| Winter | -0.84                      | 272.31  | 1.005                         | 0.0204           | 10.82                                       | 0.127                                       |
| Spring | 14.01                      | 287.16  | 1.059                         | 0.0215           | 17.48                                       | 0.205                                       |

Table 3: Electrical conductivity as a function of mean ionic activity (Hypersaline seawater).

| Season | Mean ionic activity, $a_{\text{H}}^{(\text{eff})}$ ( $\text{mol kg}^{-1}$ ) | Electrical conductivity, $\kappa_{\text{sea}}$ ( $\text{S m}^{-1}$ ) |
|--------|-----------------------------------------------------------------------------|----------------------------------------------------------------------|
| Summer | 1.105                                                                       | 23.03                                                                |
| Autumn | 1.054                                                                       | 16.84                                                                |
| Winter | 1.005                                                                       | 10.82                                                                |
| Spring | 1.059                                                                       | 17.48                                                                |

Table 4: Electrical conductivity as a function of mean ionic activity (Treated wastewater).

| Season | Mean ionic activity, $a_{\text{TWW}}$ ( $\text{mol kg}^{-1}$ ) | Electrical conductivity, $\kappa_{\text{TWW}}$ ( $\text{S m}^{-1}$ ) |
|--------|----------------------------------------------------------------|----------------------------------------------------------------------|
| Summer | 0.0224                                                         | 0.270                                                                |
| Autumn | 0.0214                                                         | 0.198                                                                |
| Winter | 0.0204                                                         | 0.127                                                                |
| Spring | 0.0215                                                         | 0.205                                                                |

## Abbreviations

Table 1: List of abbreviations used in this study.

| Abbreviation                        | Definition                                                     |
|-------------------------------------|----------------------------------------------------------------|
| RED                                 | Reverse Electrodialysis                                        |
| OCV                                 | Open-circuit voltage                                           |
| $E_{\text{OCV}}$                    | Open-circuit voltage of a RED stack                            |
| $E_{\text{OCV}}^{\text{ideal}}$     | Ideal Nernstian open-circuit voltage                           |
| $E_{\text{OCV}}^{\text{ideal-sol}}$ | Ideal-solution open-circuit voltage                            |
| $\Delta E_{\gamma}$                 | Voltage deviation due to activity-coefficient effects          |
| $R$                                 | Universal gas constant                                         |
| $T$                                 | Absolute temperature                                           |
| $T_C$                               | Temperature in degrees Celsius                                 |
| $F$                                 | Faraday constant                                               |
| $z$                                 | Effective ionic charge number                                  |
| $N$                                 | Number of membrane cell pairs in the RED stack                 |
| $\alpha$                            | Average membrane permselectivity                               |
| $a_i$                               | Ionic activity of species $i$                                  |
| $a_{\pm}$                           | Mean ionic activity                                            |
| $\gamma_i$                          | Activity coefficient of ion $i$                                |
| $\gamma_{\pm}$                      | Mean ionic activity coefficient                                |
| $m_i$                               | Molality of ion $i$                                            |
| $m^{\circ}$                         | Standard molality (1 mol kg <sup>-1</sup> )                    |
| $a_{\text{H}}^{(\text{eff})}$       | Effective charge-equivalent activity of the hypersaline stream |
| TWW                                 | Treated wastewater                                             |
| $I$                                 | Ionic strength                                                 |
| Pitzer model                        | Thermodynamic model for non-ideal electrolyte solutions        |
| $B_{ij}$                            | Binary Pitzer interaction parameter                            |
| $C_{ijk}$                           | Ternary Pitzer interaction parameter                           |
| $\kappa$                            | Electrical conductivity                                        |
| $\kappa_{\text{sea}}$               | Electrical conductivity of hypersaline seawater                |
| $\kappa_{\text{TWW}}$               | Electrical conductivity of treated wastewater                  |
| $\lambda_i^0$                       | Limiting equivalent conductance of ion $i$                     |
| $\bar{\lambda}^0$                   | Mixture limiting equivalent conductance                        |
| $y_i$                               | Charge-equivalent fraction of ion $i$                          |
| $c_{\text{eq}}^0$                   | Charge-equivalent volumetric concentration                     |
| $f_{\kappa}$                        | Empirical mobility-reduction factor                            |
| $R_{\text{ch}}$                     | Channel (solution) resistance                                  |
| $A$                                 | Channel cross-sectional area                                   |
| $l$                                 | Channel length                                                 |
| $W_{\text{rev}}$                    | Reversible electrochemical work                                |
| $\Delta G_{\text{mix}}$             | Gibbs free energy of mixing                                    |
